# Supplementary material for: Mood instability may be causally associated with the high risk of cardiovascular disease: evidence from a mendelian randomization analysis
Source: medRxiv preprint, doi:10.1101/2023.08.29.23294761, version 1 (2023-08-29)
Supplement: Figure S1 [file 294761_file02.docx]

**Mood instability** **may causally associate with the high risk of cardiovascular disease: evidence from a mendelian randomization analysis**

***Supplementary materials***

Zirui Liu, Haocheng Wang, Zhengkai Yang, Yu Lu, Cao Zou

**Contents**

**Figure S1.** Study design and 3 assumptions of MR analysis.


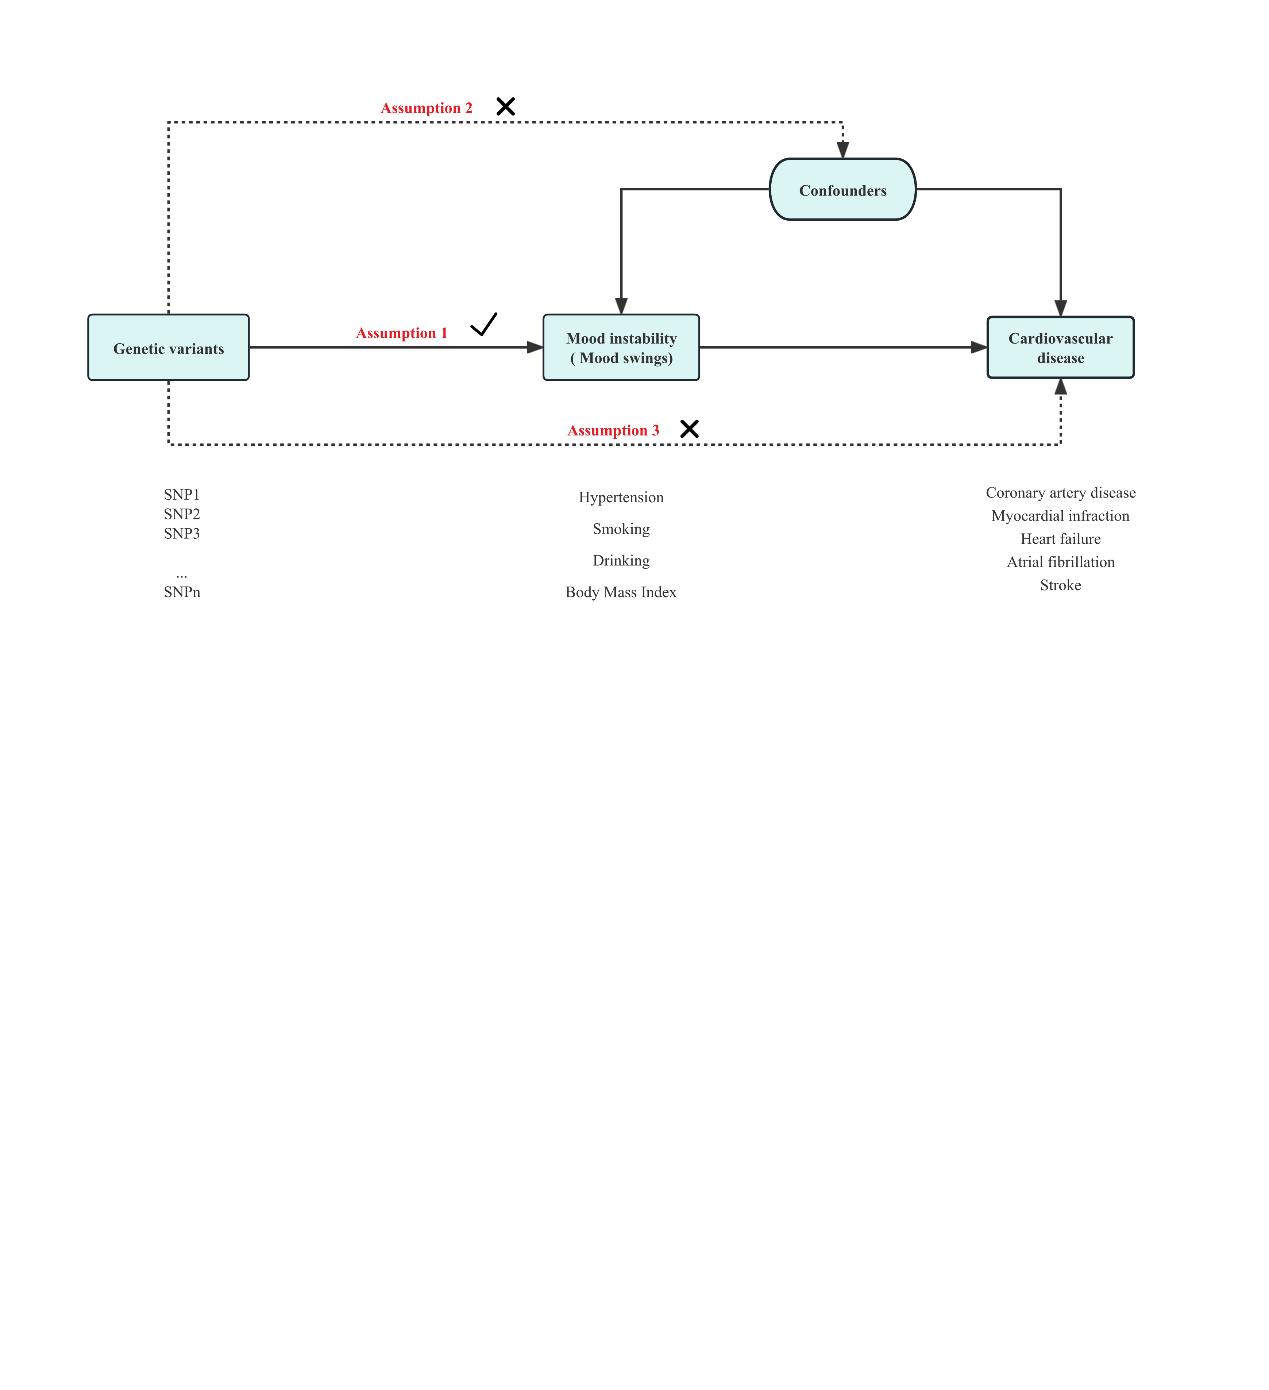


Figure S1. Study design and 3 assumptions of MR analysis.
